# Supplementary material for: Deactivation of Zeolite Catalysts in the Prins Reaction between Propene and Formaldehyde in the Liquid Phase
Source: MDPI journal article supplement (doi:10.3390/catal11101181), 2021-09-28
Supplement: s1 [file s1]

# Deactivation of zeolite catalysts in the Prins condensation between propylene and formaldehyde in the liquid phase

Stanislav P. Bedenko\*, Konstantin I. Dement'ev, Valentin F. Tret'yakov<sup>‡</sup>

A.V. Topchiev Institute of Petrochemical Synthesis RAS, Moscow, Russia

\*Corresponding author at: Moscow 119991, Leninsky Ave 29, Russia

e-mail address: bedenko@ips.ac.ru

<sup>‡</sup>Deceased

## Supplementary information

Table S1. XRF results

| Sample            | H-BEA | H-FAU | H-MFI | H-MOR |
|-------------------|-------|-------|-------|-------|
| Si/Al theoretical | 15    | 25    | 25    | 10    |
| Si/Al             | 17.2  | 22.0  | 22.6  | 13.0  |
| Al/Na             | 0     | 67.6  | 0     | 0     |

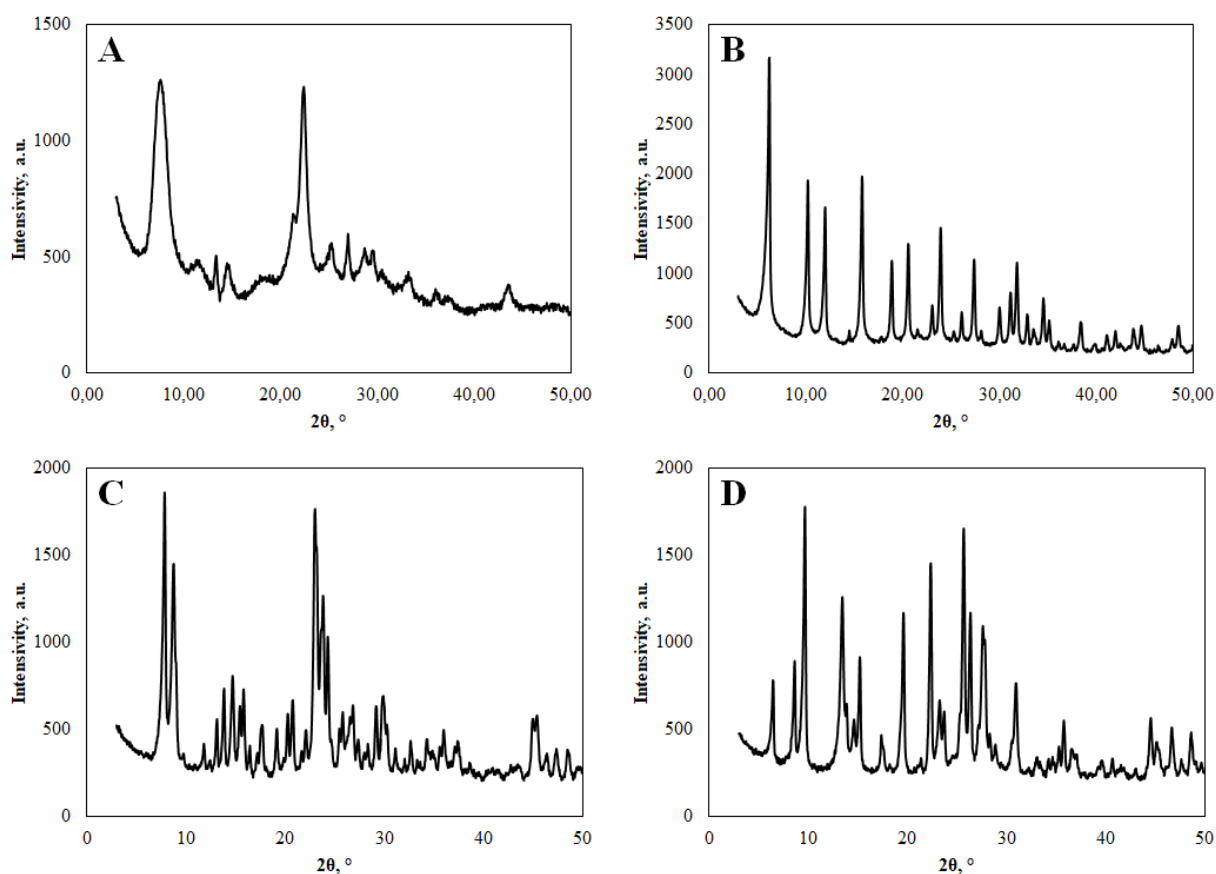

Figure S1. XRD patterns: A – H-BEA, B – H-FAU, C – H-MFI and D – H-MOR.

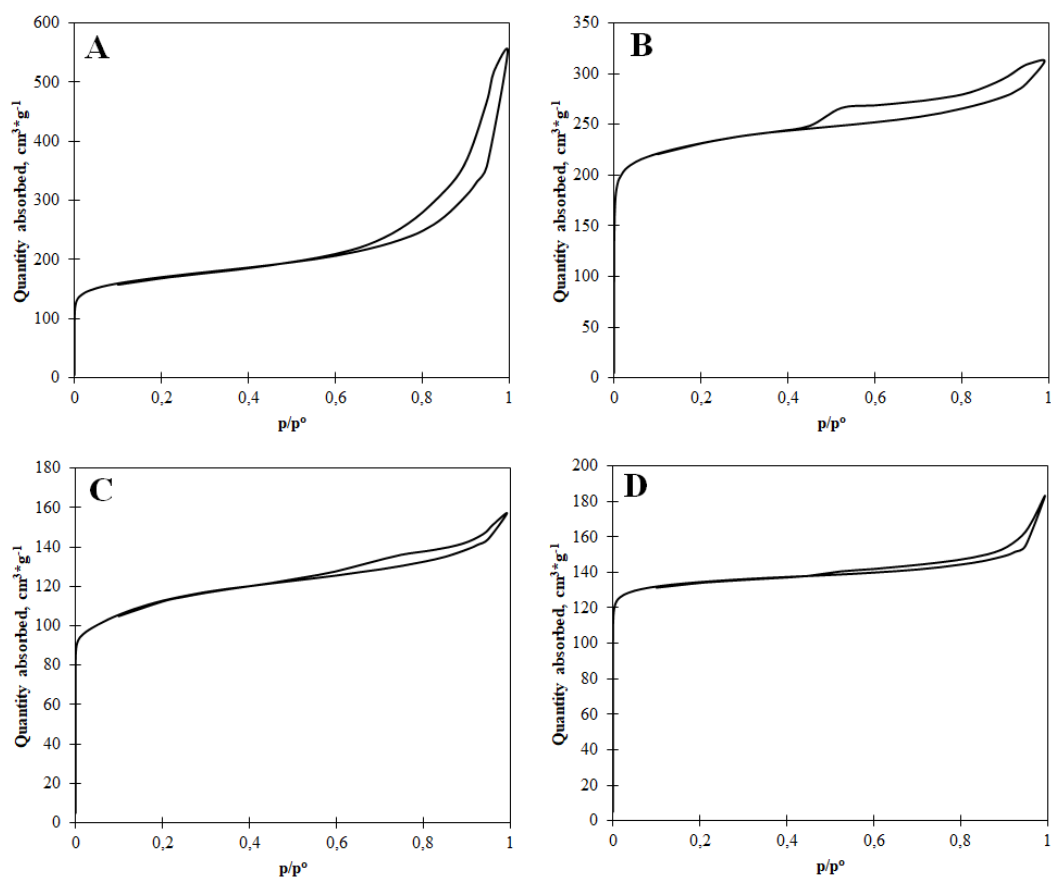

**Figure S2.** The nitrogen physisorption isotherms: A – H-BEA, B – H-FAU, C – H-MFI and D – H-MOR.

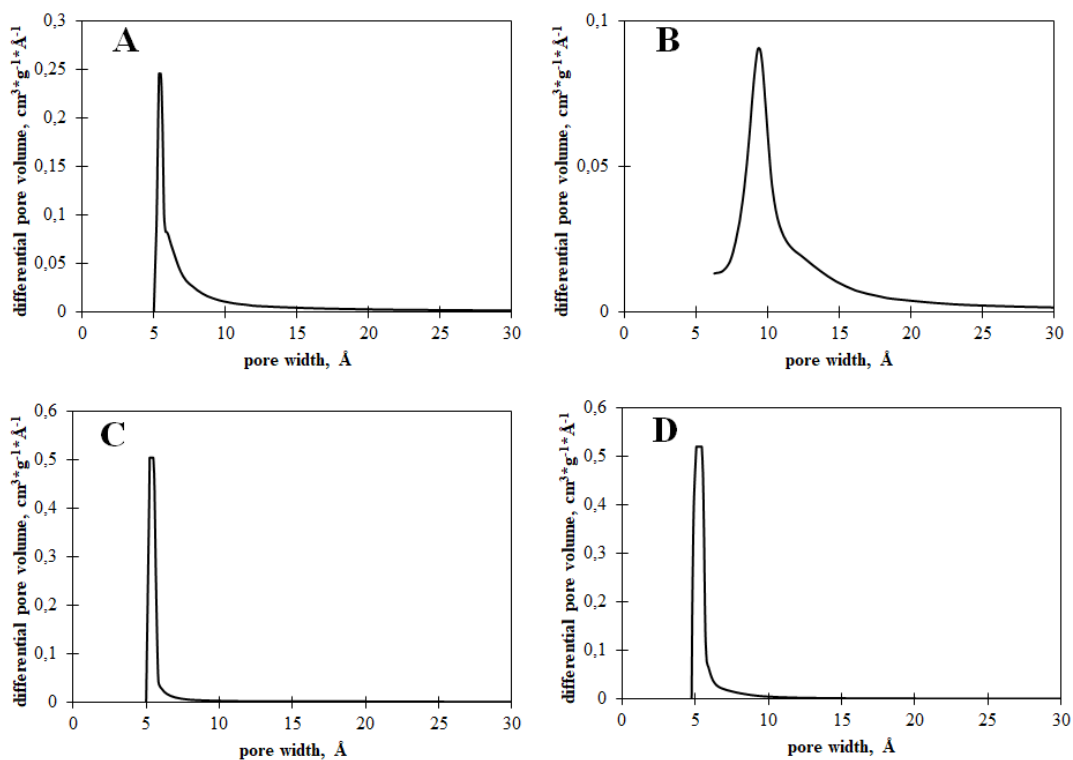

**Figure S3.** The Horwath-Kawazoe pore volume distribution: A – H-BEA, B – H-FAU, C – H-MFI and D – H-MOR.

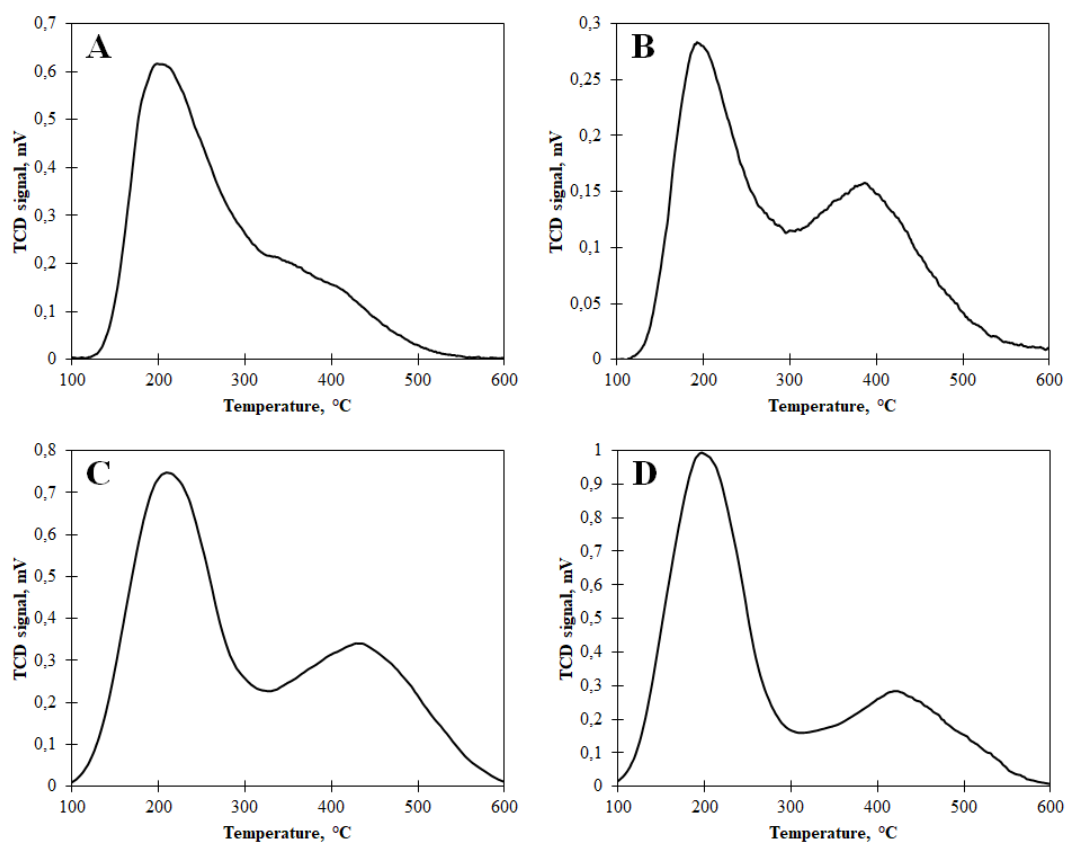

**Figure S4.** The TCD-NH<sub>3</sub> curves: A – H-BEA, B – H-FAU, C – H-MFI and D – H-MOR.

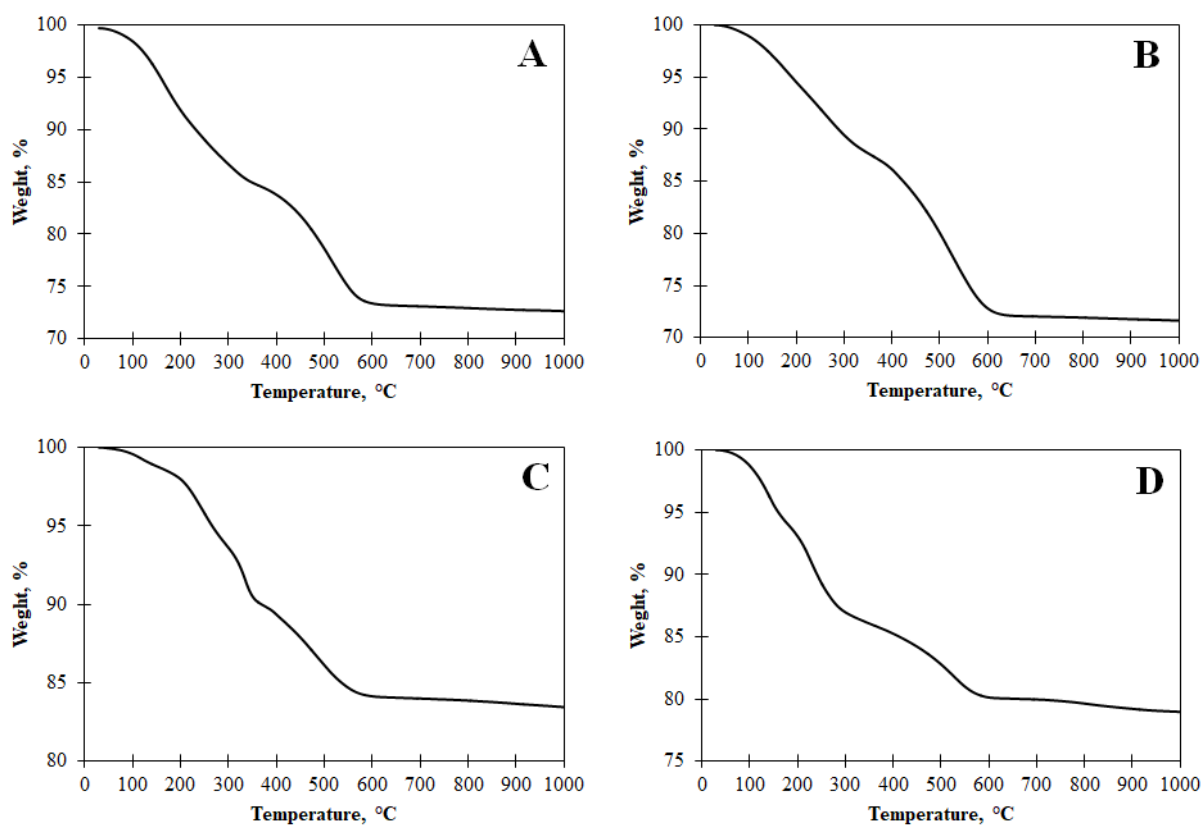

**Figure S5.** The TGA curves of spend samples: A – H-BEA, B – H-FAU, C – H-MFI and D – H-MOR.

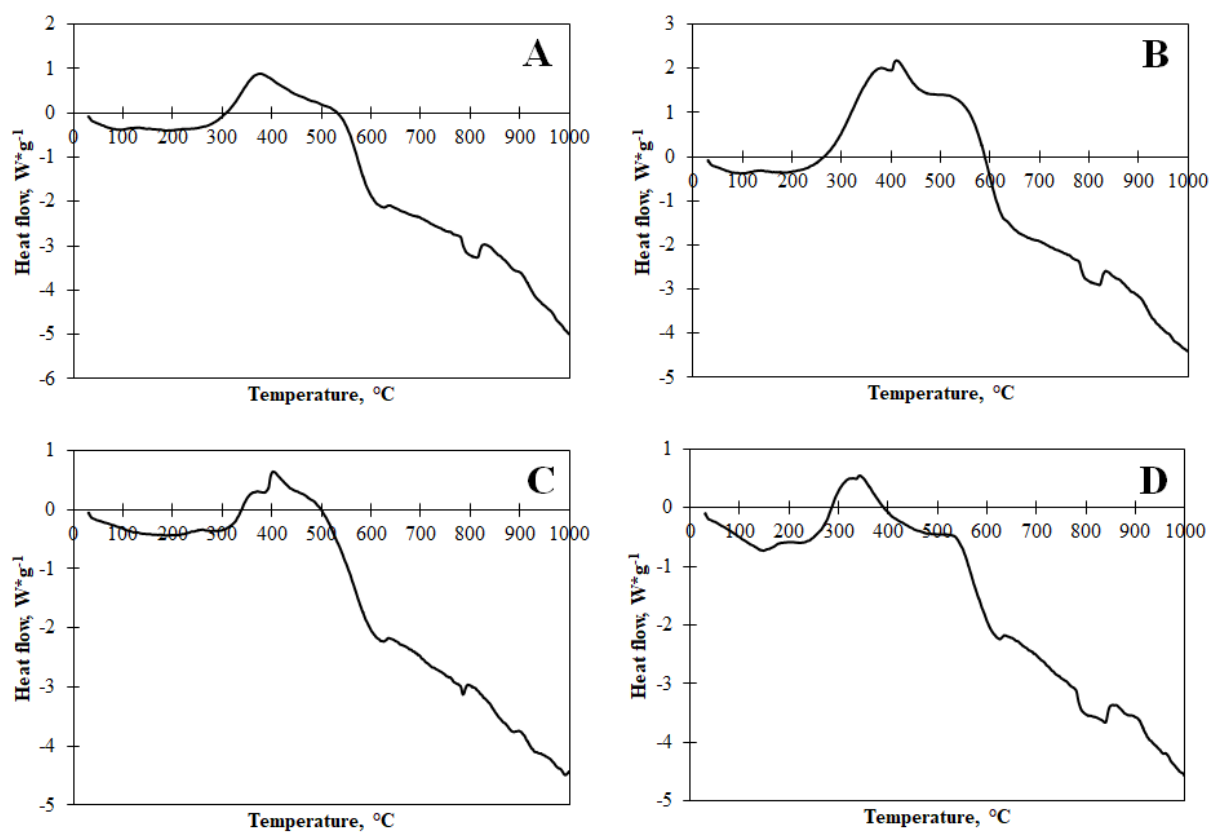

**Figure S6.** The DSC curves of spend samples: A – H-BEA, B – H-FAU, C – H-MFI and D – H-MOR.

**Table S2.** Activity of regenerated samples

| Sample | X,<br>% | Selectivity toward, %                                                               |                                                                                     |                                                                                     |                                                                                      |                                                                                       |                                                                                       |        |
|--------|---------|-------------------------------------------------------------------------------------|-------------------------------------------------------------------------------------|-------------------------------------------------------------------------------------|--------------------------------------------------------------------------------------|---------------------------------------------------------------------------------------|---------------------------------------------------------------------------------------|--------|
|        |         | 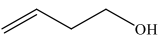 |  |  |  |  |  | other* |
| H-BEA  | 44.7    | 1.9                                                                                 | 1.1                                                                                 | 55.3                                                                                | 19.2                                                                                 | 9.2                                                                                   | 10.1                                                                                  | 3.2    |
| H-MFI  | 19.4    | 34.2                                                                                | 14.6                                                                                | 27.7                                                                                | 7.6                                                                                  | 8.8                                                                                   | 5.3                                                                                   | 1.8    |

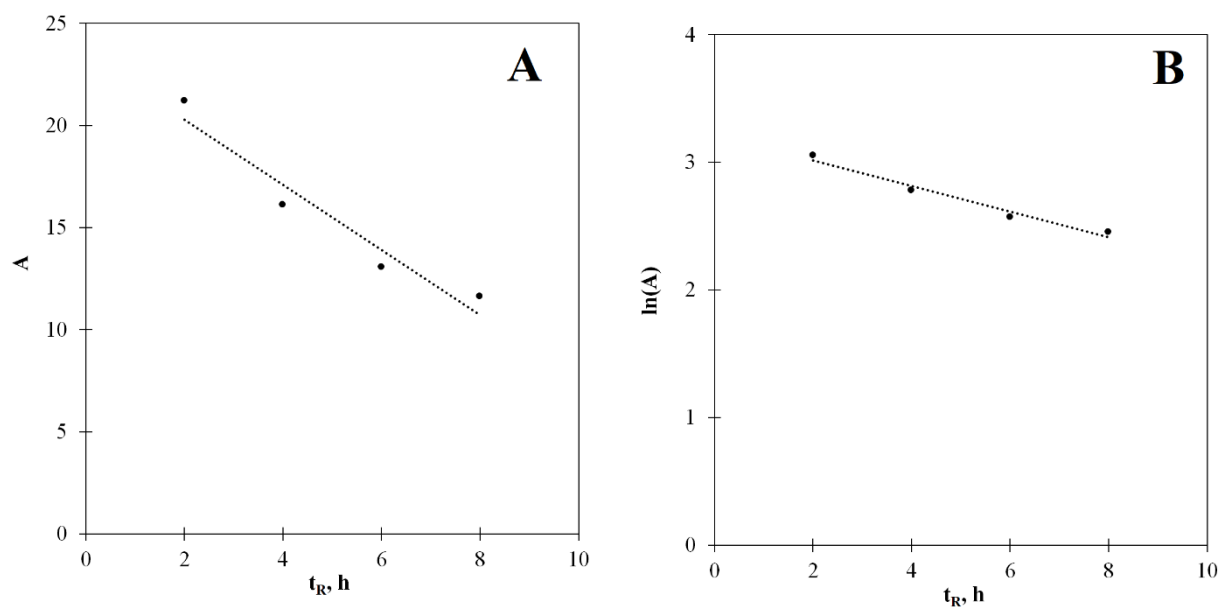

**Figure S7.** Activity vs.  $t_R$  (A) and  $\ln(\text{activity})$  vs.  $t_R$  (B) curves for H-BEA

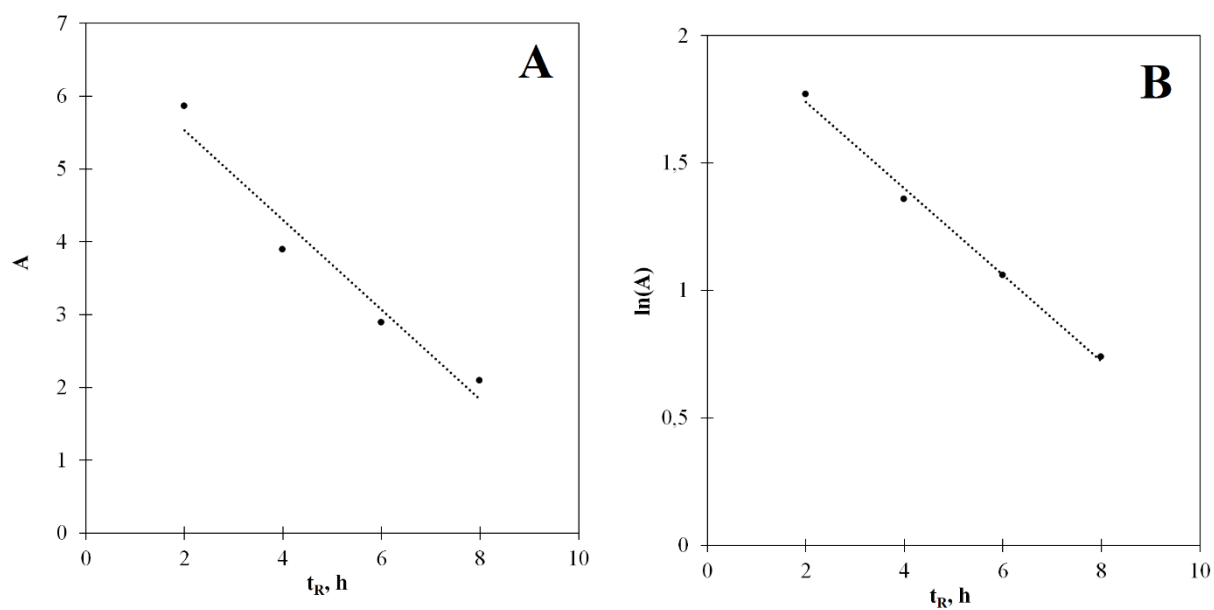

**Figure S8.** Activity vs.  $t_R$  (A) and  $\ln(\text{activity})$  vs.  $t_R$  (B) curves for H-MFI.

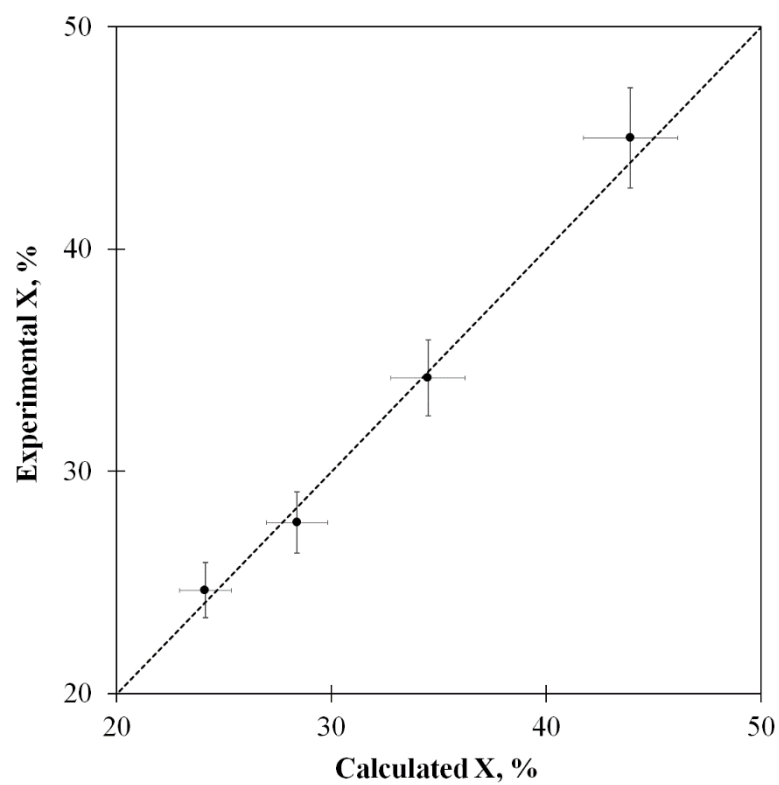

**Figure S9.** The calculated X vs experimental X for H-BEA.

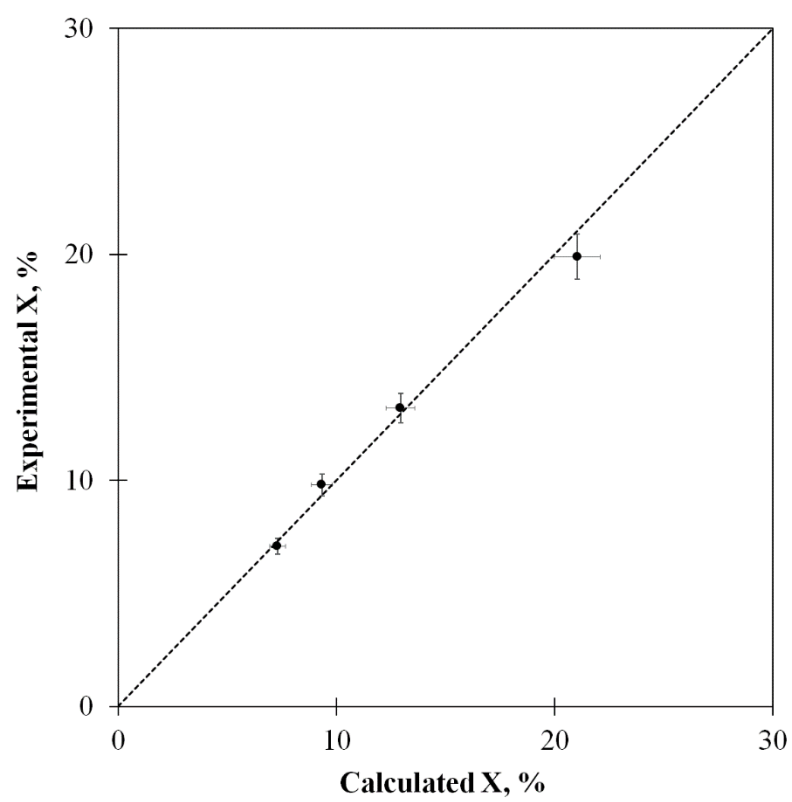

**Figure S10.** The calculated X vs experimental X for H-MFI.
