# Supplementary material for: Deactivation of Zeolite Catalysts in the Prins Reaction between Propene and Formaldehyde in the Liquid Phase
Source: MDPI journal article supplement (doi:10.3390/catal11101181), 2021-09-28
Supplement: s1 [file s1]

Archive with 1 entries (1 files):
- catalysts-1386469-supplementary.pdf
